# Supplementary material
Source: Springer Nature journal article supplement (https://www.springermedizin.de/resource/supplementary/12985_2012_2134_MOESM8_ESM.pdf/9606692)

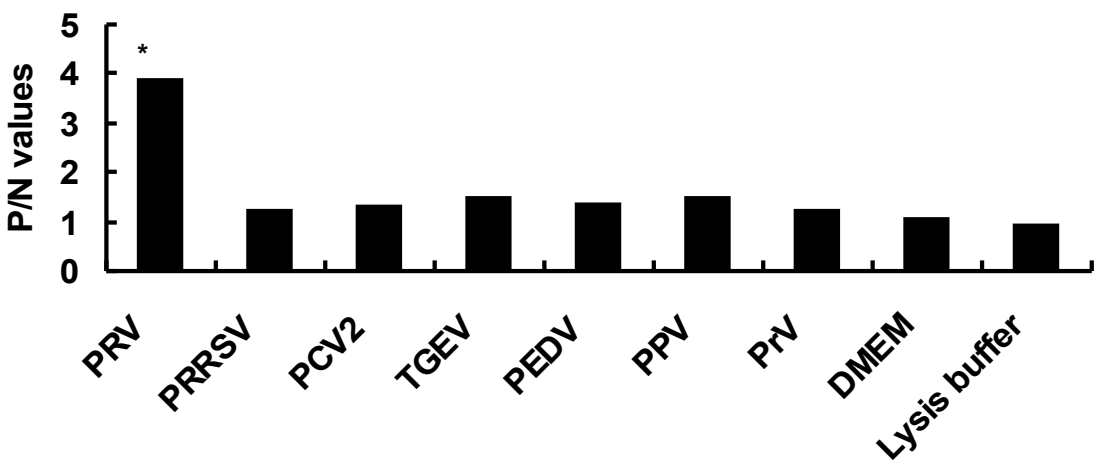

Supplement: MOESM8 [file 9606692]
